# Supplementary material
Source: PubMed Central journal article supplement (PMC7685206)

## Supplementary Figure 1. Dosing schedule for AFM13 and pembrolizumab as combination treatment

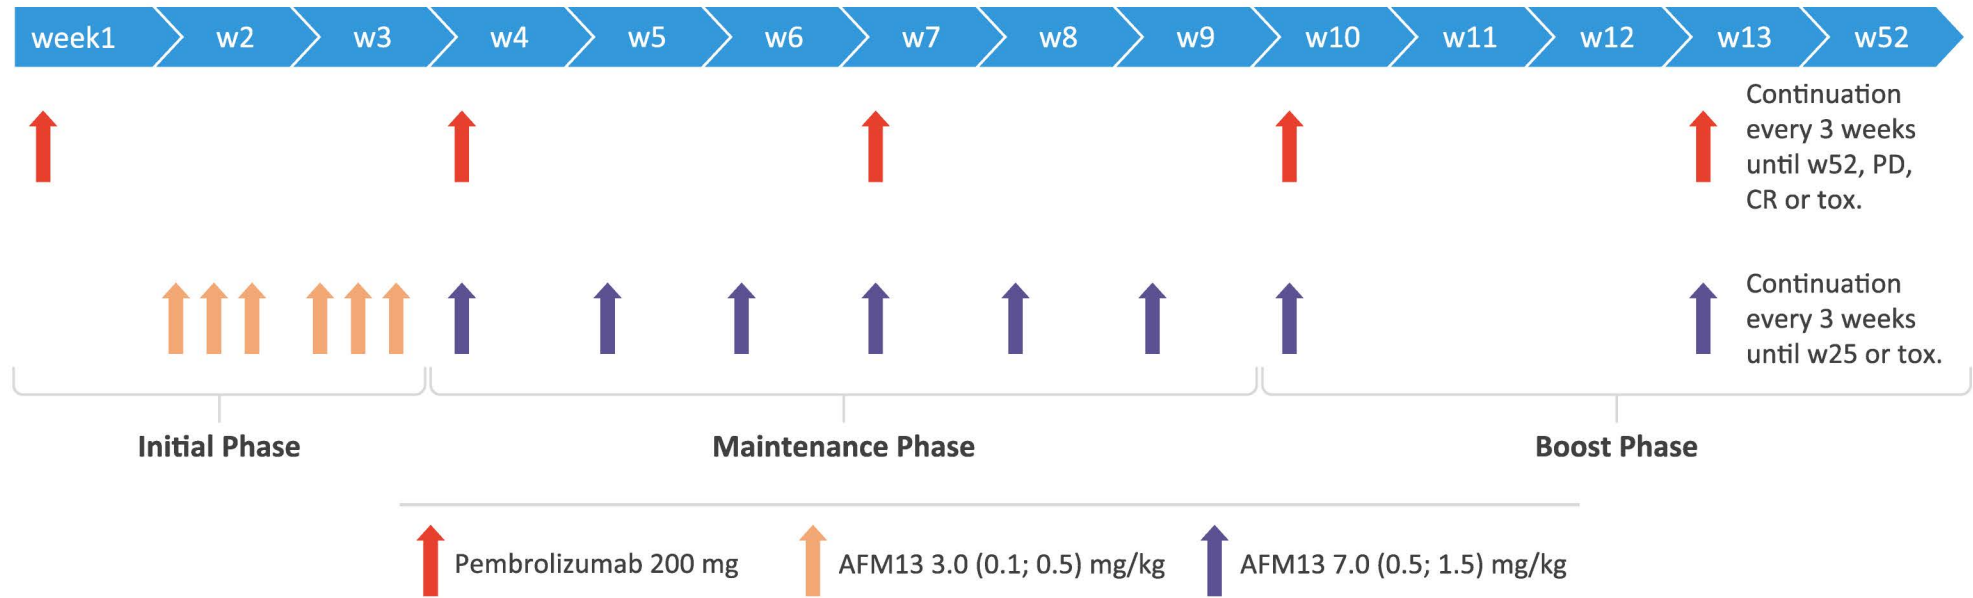

CR, complete response; PD, progressive disease; tox, toxicity; w, week.

Supplementary Figure 2. Duration and deepening of responses

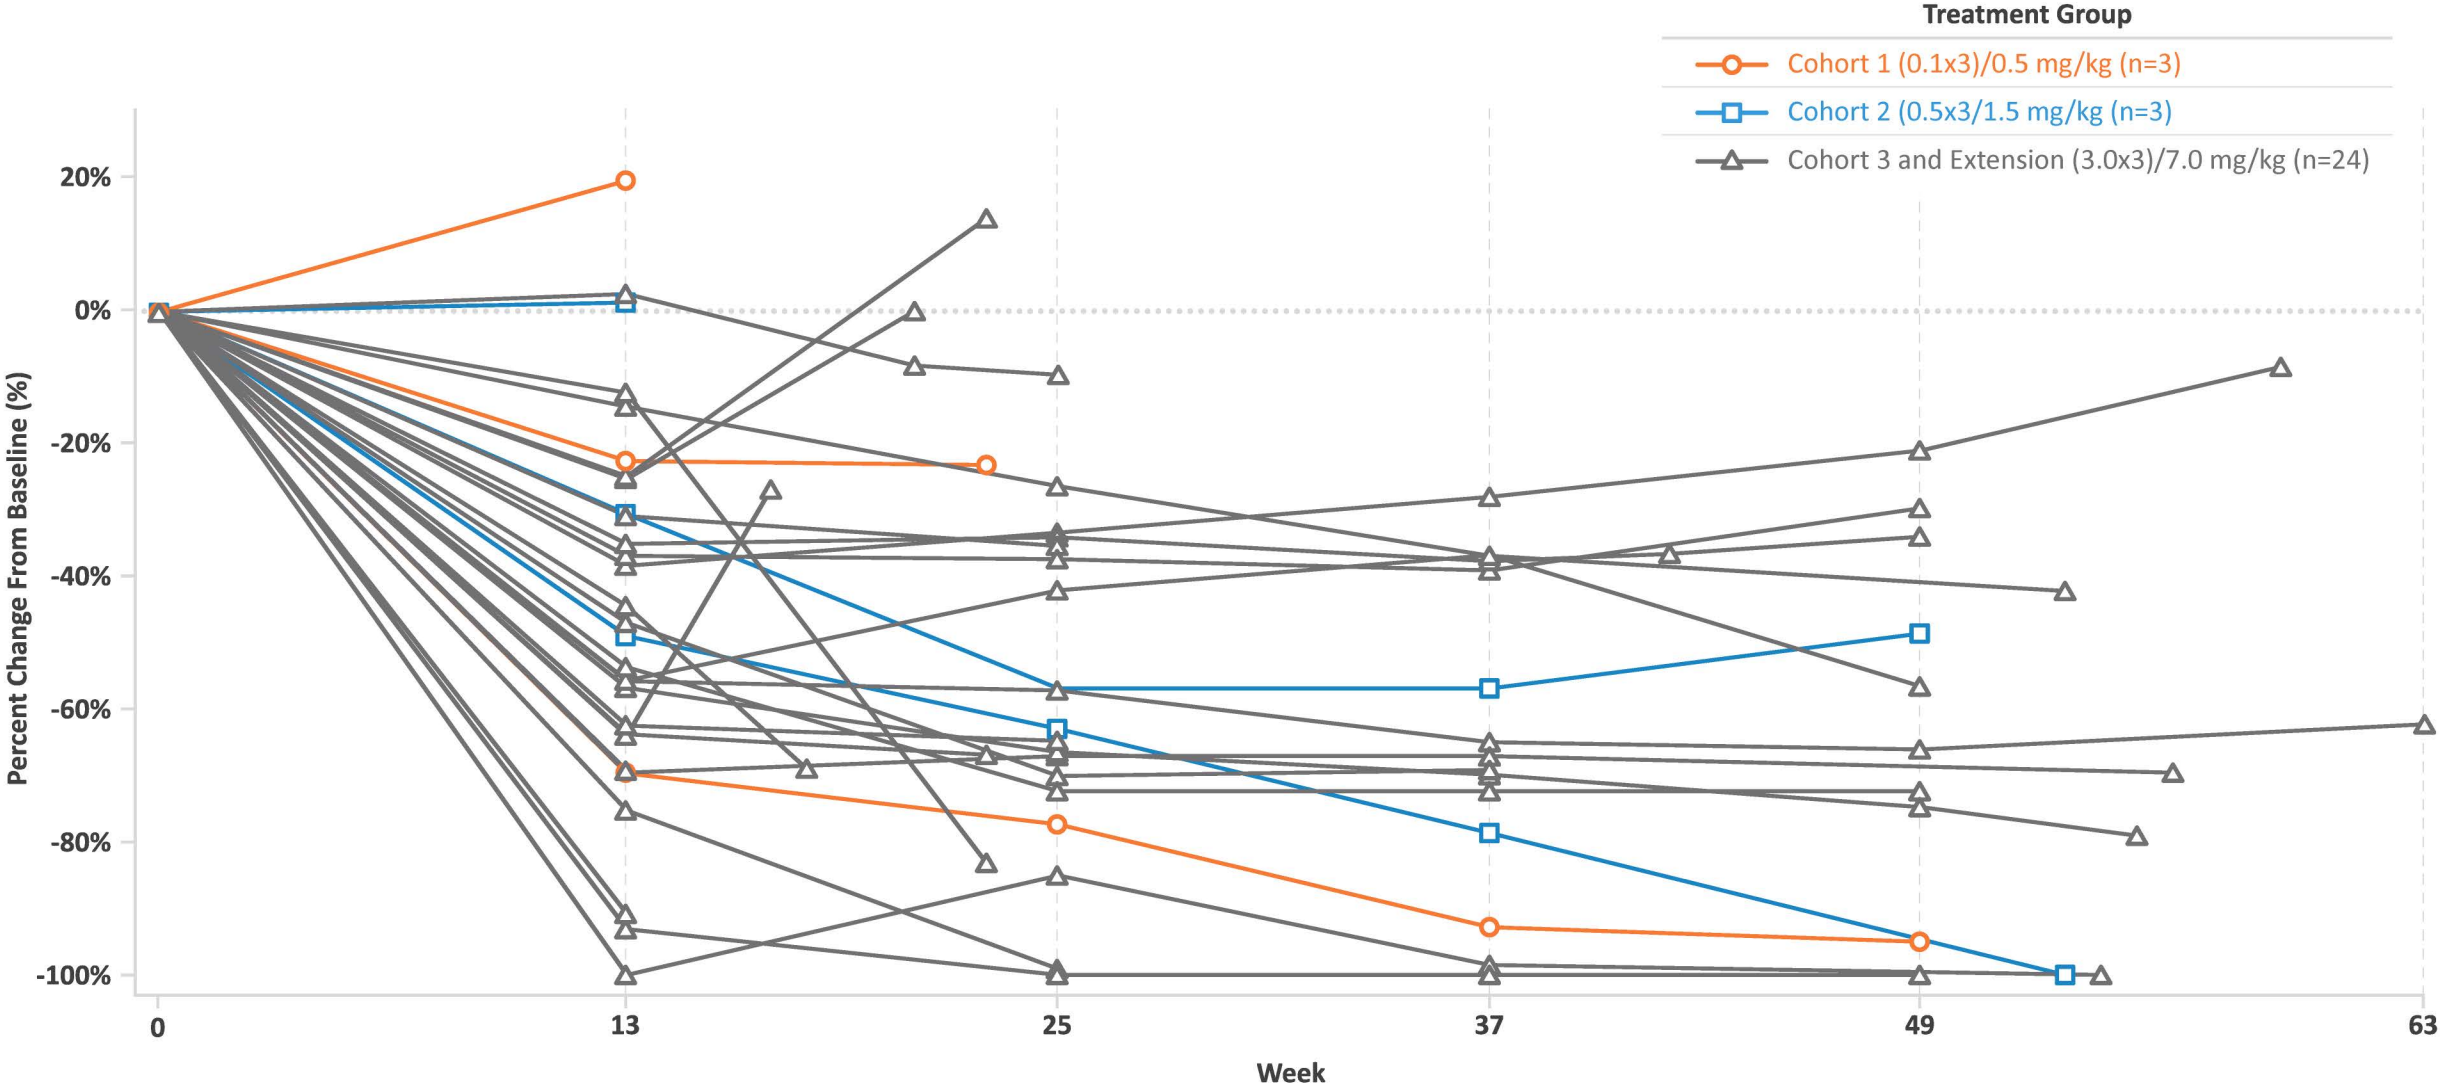

Supplement: bloodBLD2019004701-suppl1.pdf [file bloodBLD2019004701-suppl1.pdf]
